# Supplementary material for: Ir nanoclusters/porous N-doped carbon as a bifunctional electrocatalyst for hydrogen evolution and hydrazine oxidation reactions
Source: Royal Society of Chemistry journal article supplement (doi:10.1039/d1cc06972a), 2022-01-01
Supplement: d1cc06972a1.pdf [file d1cc06972a1.pdf]

## Supplementary Information

### **Ir Nanoclusters/Porous N-Doped Carbon as Bifunctional Electrocatalyst for Hydrogen Evolution and Hydrazine Oxidation Reactions**

Hong-Li Huang,<sup>#</sup> Xiya Guan,<sup>#</sup> Haibo Li, Ruiqing Li, Rui Li, Suyuan Zeng, Shuo Tao, Qingxia Yao, Hongyan Chen and Konggang Qu\*

School of Chemistry and Chemical Engineering, Shandong Provincial Key Laboratory/Collaborative Innovation Center of Chemical Energy Storage & Novel Cell Technology, Liaocheng University, Liaocheng 252059, China  
Email: [qukonggang@lcu.edu.cn](mailto:qukonggang@lcu.edu.cn)

## 1. Experimental

### 1.1 Materials

$\text{IrCl}_3 \cdot n\text{H}_2\text{O}$ , 2-phenylpyridine, and silica nanoparticles were purchased from Aladdin Industrial Corporation (Shanghai, China). The commercial 20% Pt/C was provided by Shanghai Hesen Corporation. The commercial 20% Ir/C was purchased from Premetek Co.

### 1.2 Synthesis

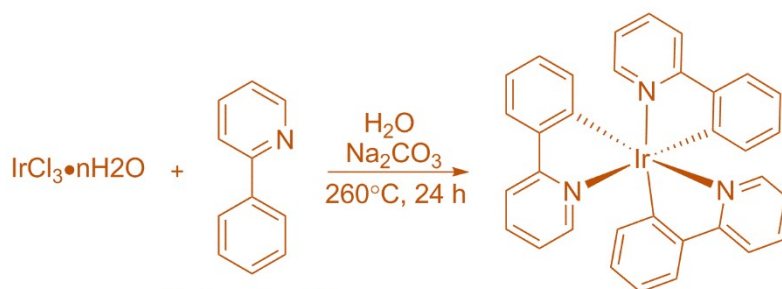

Tris(2-phenylpyridine)iridium ( $\text{Ir}(\text{ppy})_3$ ) was synthesized according to the literature.<sup>1</sup> To a two necked, 500 mL round bottom flask equipped with a magnetic stir bar were added iridium (III) chloride (192 mg, 0.64 mmol), 2-phenylpyridine (1.19 g, 7.7 mmol),  $\text{Na}_2\text{CO}_3$  (407 mg, 3.8 mmol), and distilled water (213 mL). The mixture was degassed with Ar for 15 min and then heated to  $260^\circ\text{C}$  for 24 h. After cooling to room temperature, reaction mixture was extracted with DCM ( $3 \times 250$  mL). The organic layer was combined, dried ( $\text{MgSO}_4$ ), filtered, and concentrated in vacuo. The resulting residue was purified by column chromatography (DCM) to afford the desired  $\text{Ir}(\text{ppy})_3$  in 79% yield (311 mg, 0.47 mmol) as a yellow solid.

200 mg  $\text{Ir}(\text{ppy})_3$  was added into 90 mL ethyl alcohol. Then silica powder ( $\text{SiO}_2$ , 1.6 g) was added, and further dispersed to form a homogeneous yellow solution. The mixture was stirred overnight and dried by rotary evaporation. The obtained powder was pyrolyzed under  $700^\circ\text{C}$  for 3 h in a tube furnace with a heating rate of  $5^\circ\text{C min}^{-1}$  at Ar atmosphere, to yield silica-templated Ir/PNC. To remove the silica template, the composite material was placed into a freshly prepared solution containing hydrofluoric acid aqueous solution and stirred for 6 h.<sup>2</sup> After the materials were washed repeatedly by centrifugation. The resultant Ir/PNC were dried in vacuum oven at  $80^\circ\text{C}$  for 18 h. The content of Ir is 15.0 wt% determined with inductively coupled plasma optical

emission spectrometer (ICP-OES).

Meanwhile, Ir/N-doped carbon material (Ir/NC) was prepared following the same procedure as Ir/PNC without silica nanoparticles with 17.3 wt% Ir loading determined by ICP-OES.

### 1.3 Characterizations

The morphology and structure were examined by the transmission electron microscope (TEM, Talos F200X G2), powder X-ray diffraction (XRD, SmartLab 9kW) and Raman spectrometer with an excitation wavelength of 532 nm (HORIBA iHR550). The component information was obtained by TEM energy-dispersive X-ray spectroscopy (EDS) mapping and X-ray photoelectron spectroscopy (XPS, Kratos Axis Ultra spectrometer). The specific surface areas were extracted with nitrogen adsorption-desorption isotherm (Micrometrics Tristar II) by the Brunauer-Emmett-Teller (BET) model at a pressure range of  $P/P_0 = 0.05-0.3$ , along with the Barrett-Joyner-Halenda (BJH) model for pore size distribution by the adsorption branch on isotherm. ICP-OES was performed with PerkinElmer Optima 8300.

### 1.4 Electrocatalytic experiments

The electrochemical station (Reference 3000, Gamry Instruments, USA) with a rotating disk electrode (RDE) system were used to conduct the electrochemical measurements. For the preparation of working electrode, the samples were initially ultrasonically dispersed into aqueous inks with the concentration of  $2 \text{ mg mL}^{-1}$ .  $20 \mu\text{L}$  of the catalyst ink was dropped onto a pre-prepared RDE with the diameter of 5 mm and dried at ambient condition, then  $5 \mu\text{L}$  of 0.5 wt. % Nafion aqueous solution was added to increase the adherence. An Ag/AgCl/KCl (3.5 M) electrode and a graphitic carbon was selected as the reference and counter electrodes, the volume of 100 mL electrolyte was added into a 5-port electrolytic cell with  $\text{N}_2$  gas inlet during the tests. The equation  $E_{\text{RHE}} = E_{\text{Ag/AgCl}} + (0.205 + 0.059 \text{ pH}) \text{ V}$  was used to calibrate the potentials.

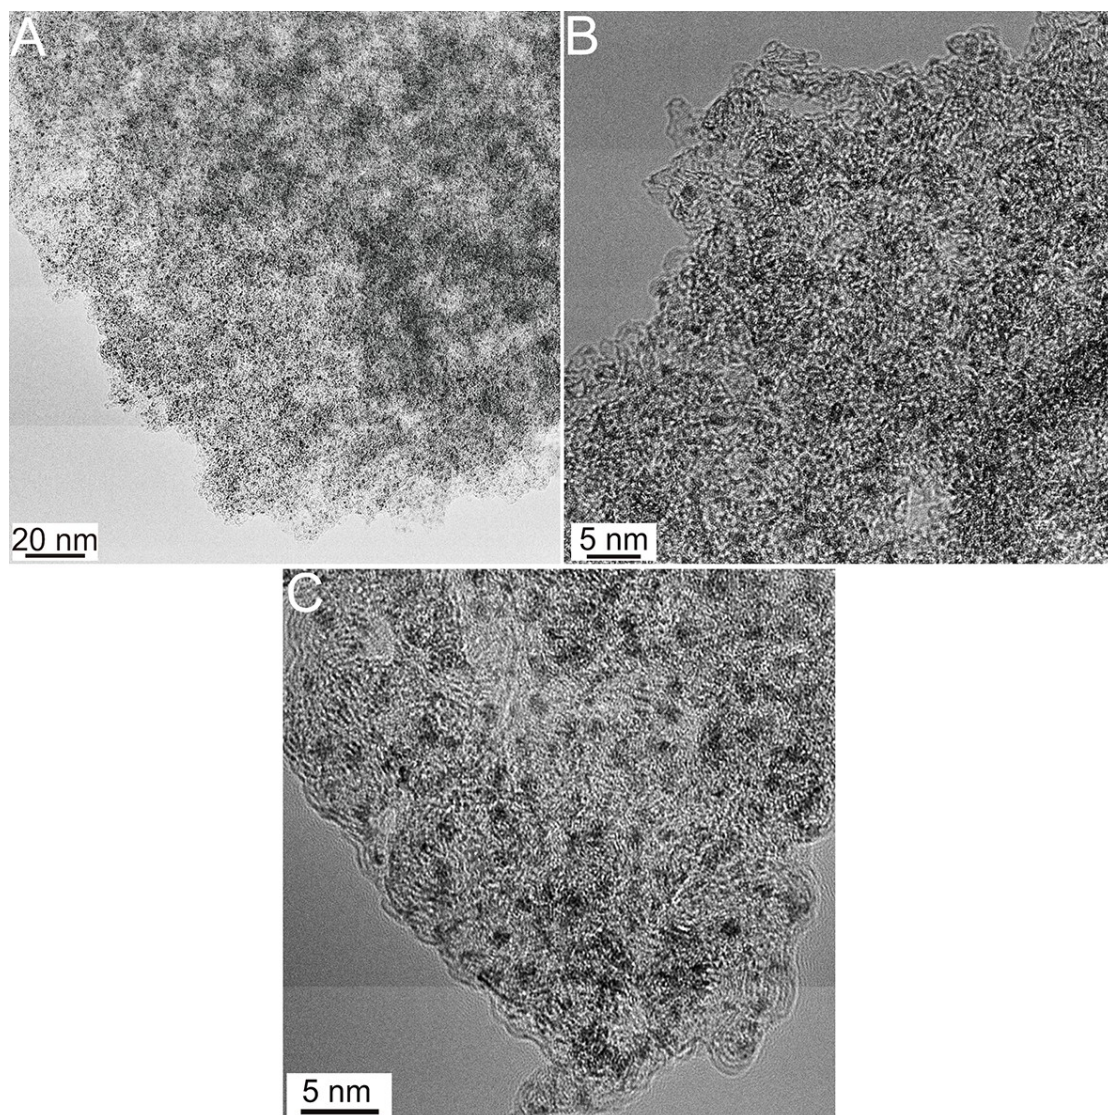

Fig. S1 TEM images of Ir/PNC at different magnifications.

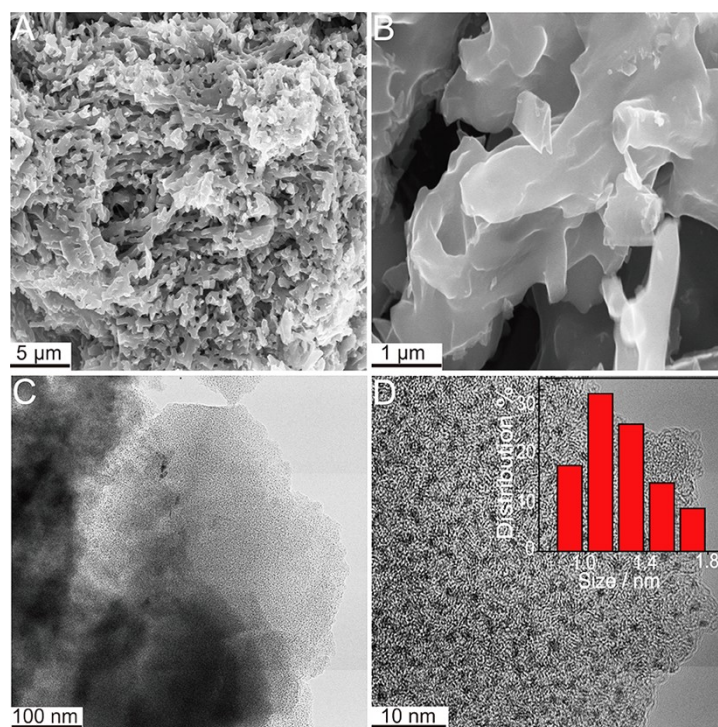

Fig. S2 (A, B) SEM images of Ir/NC at different magnifications. (C, D) TEM images of Ir/NC at different magnifications, Inset: The corresponding Ir size distribution for Ir/NC.

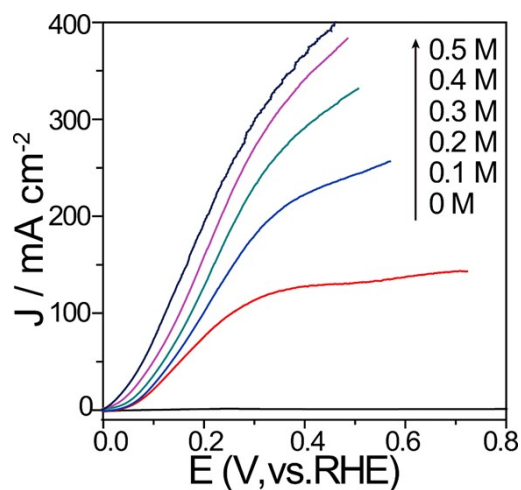

Fig. S3 LSV curves of Ir/PNC in 1.0 M KOH containing different concentrations of  $\text{N}_2\text{H}_4$ .

As shown in Fig. S3, negligible anodic current was produced in the potential range of 0~0.8 V (vs. RHE) without hydrazine. In contrast, the anodic current density increases strongly with the progressive addition of 0.1~0.3 M  $\text{N}_2\text{H}_4$  and while only rises slightly with the concentration of  $\text{N}_2\text{H}_4$  up to 0.4~0.5 M. Therefore, 1.0 M KOH containing 0.5 M  $\text{N}_2\text{H}_4$  was chosen as the electrolyte for HzOR.



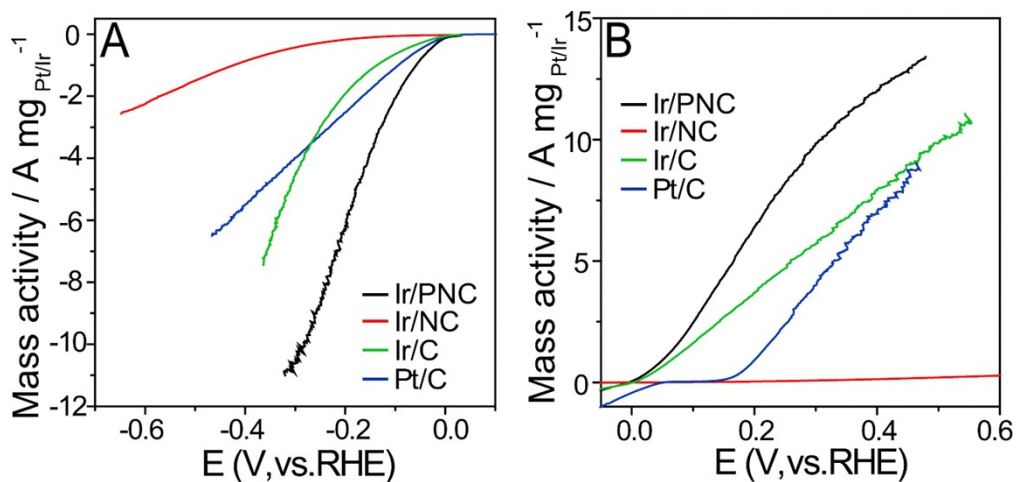

Fig. S4. Mass activity of different catalysts for (A) HER and (B) HzOR.

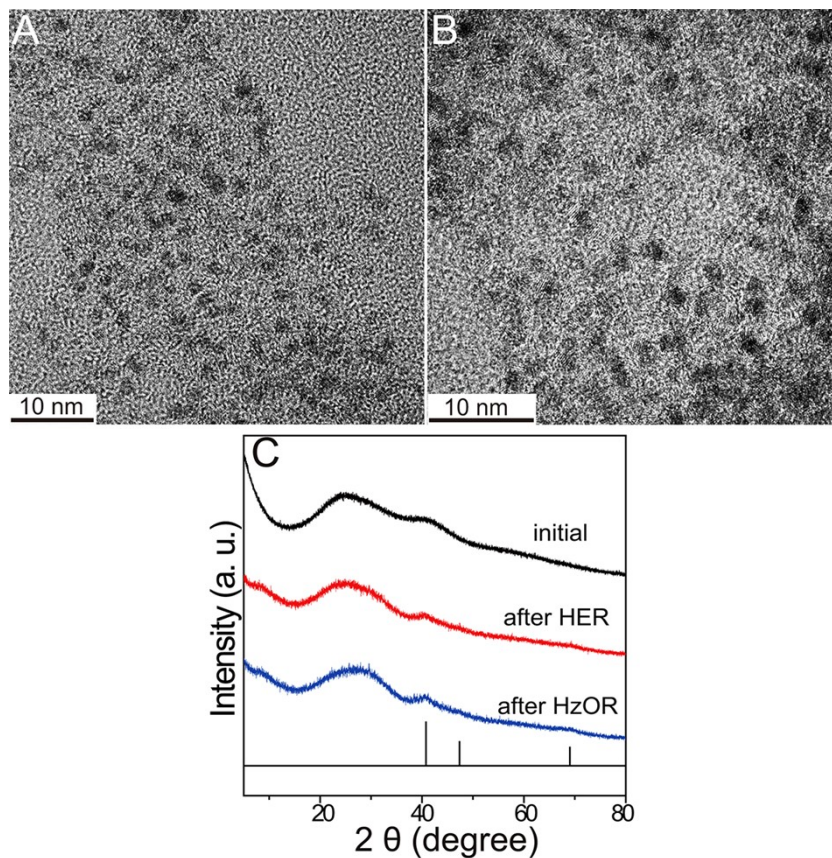

Fig. S5. The TEM images of Ir/PNC after 10 h's stability test for (A) HER and (B) HzOR, respectively. (C) The compared XRD patterns of initial Ir/PNC and after 10 h's stability test for HER and HzOR.

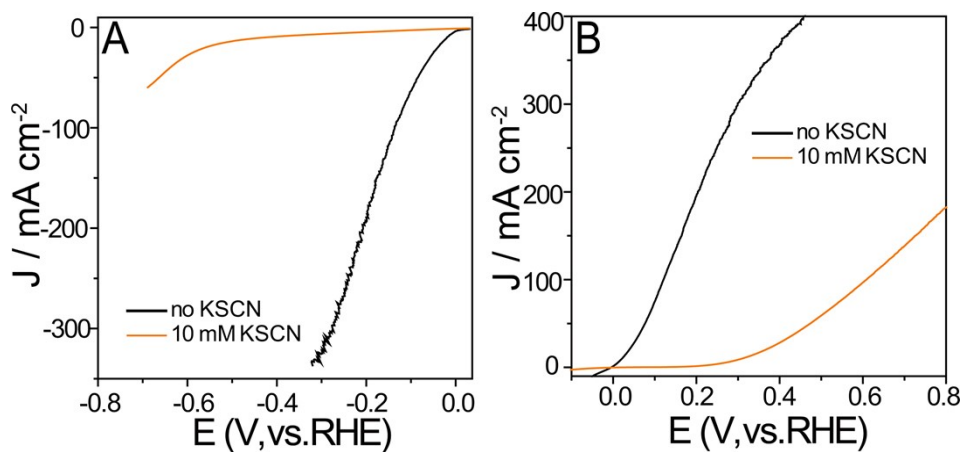

Fig. S6 The poison test of  $\text{SCN}^-$ . LSV curves for (A) HER and (B) HzOR.

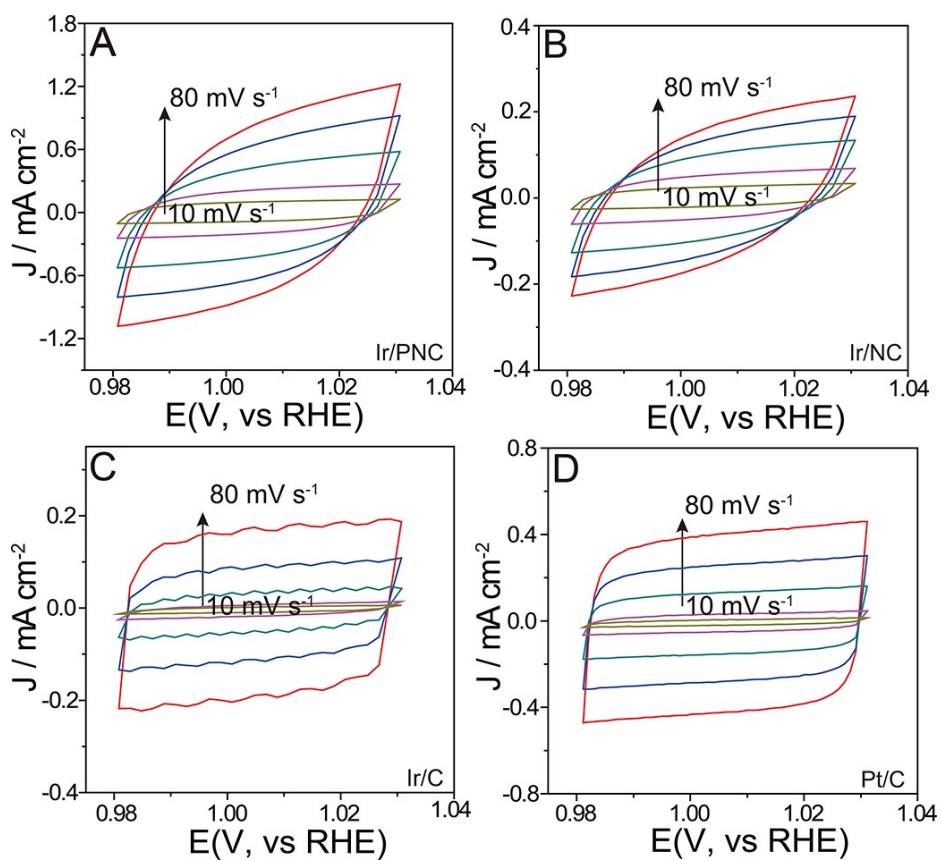

Fig. S7 CV curves at different scan rates (10, 20, 40, 60, 80 and 100  $\text{mV s}^{-1}$ ) of catalysts of (A) Ir/NPC, (B) Ir/NC, (C) Ir/C and (D) Pt/C.

Table S1. Quantitative XPS information of different samples.

| Sample        | N (at%)    |                |              |      |                | Ir (at%) |      | C (at%) | O (at%) |
|---------------|------------|----------------|--------------|------|----------------|----------|------|---------|---------|
|               | total<br>N | Graphitic<br>N | Pyrolic<br>N | Ir-N | Pyridinic<br>N | Ir       | Ir-O |         |         |
| <b>Ir/PNC</b> | 6.77       | 2.83           | 1.58         | 1.53 | 0.83           | 1.58     | 1.32 | 74.65   | 15.68   |
| <b>Ir/NC</b>  | 5.33       | 1.61           | 1.41         | 1.15 | 1.16           | 1.38     | 0.36 | 81.6    | 11.33   |



Table S2 Comparison on the activity of the reported Ir-based HER catalysts in alkaline electrolyte.

| Materials                                  | $\eta_{10}$<br>(mV) | Tafel slope<br>(mV dec <sup>-1</sup> ) | References                                           |
|--------------------------------------------|---------------------|----------------------------------------|------------------------------------------------------|
| Ir/PNC                                     | 19.8                | 45.5                                   | This work                                            |
| RhIr MNs                                   | 20                  | 30.7                                   | <i>J. Mater. Chem. A</i> , 2021, 9, 18323.           |
| Ir-NR/C                                    | 42                  | 35.2                                   | <i>Appl. Catal., B-Environ.</i> , 2020, 279, 119394. |
| 3%Ir-NCNSs                                 | 125                 | 107                                    | <i>ACS Appl. Mater. Inter.</i> , 2021, 13, 22448.    |
| Ir/CN                                      | 12                  | 28                                     | <i>ACS Appl. Mater. Inter.</i> , 2018, 10, 22340.    |
| RuIr@NrC                                   | 28                  | 35                                     | <i>Chem. Eng. J.</i> , 2021, 417, 128105.            |
| IrP <sub>2</sub> @NC                       | 28                  | 50                                     | <i>Energy Environ. Sci.</i> , 2019, 12, 952.         |
| IrP <sub>2</sub> @NPC                      | 42                  | 56                                     | <i>J. Mater. Chem. A</i> , 2021, 9, 2195.            |
| Ir@CON                                     | 13.5                | 29                                     | <i>Adv. Mater.</i> , 2018, 30, 1805606.              |
| CBC-Ir-800-1.2                             | 33                  | 42.1                                   | <i>Adv. Funct. Mater.</i> , 2021, 2105562.           |
| IrP <sub>2</sub> -CNFs                     | 19                  | 20                                     | <i>Appl. Surf. Sci.</i> , 2021, 565, 150461.         |
| Co@Ir/NC-10%                               | 121                 | 73.8                                   | <i>ACS Sustainable Chem. Eng.</i> , 2018, 6, 5105.   |
| Ir/MoS <sub>2</sub>                        | 44                  | 32                                     | <i>ACS Energy Lett.</i> , 2019, 4, 368.              |
| PdIr UNWs/WFG                              | 23                  | 38.4                                   | <i>Nanoscale</i> , 2019, 11, 14561.                  |
| AC-SrIrO <sub>3</sub>                      | 139                 | 49                                     | <i>Chem. Mater.</i> , 2020, 32, 4509.                |
| Ni <sub>0.93</sub> Ir <sub>0.07</sub> /rGO | 32.5                | 64.3                                   | <i>J. Energy Chem.</i> , 2020, 49, 166.              |
| Ir <sub>1</sub> @Co/NC                     | 55                  | 119                                    | <i>Angew. Chem., Int. Ed.</i> , 2019, 58, 11868.     |
| IrW nanobranches                           | 29                  | 71.2                                   | <i>Nanoscale</i> , 2019, 11, 8898.                   |
| Ir_VG                                      | 17                  | 29                                     | <i>J. Mater. Chem. A</i> , 2019, 7, 20590.           |
| Ir-NSG                                     | 18.5                | 28.3                                   | <i>Nat. Commun.</i> , 2020, 11, 4246.                |
| Ir/CeO <sub>2</sub>                        | 36                  | 33.3                                   | <i>Chem. Commun.</i> , 2021, 57, 8798.               |
| Ir@NG-750                                  | 114                 | 113                                    | <i>J. Mater. Chem. A</i> , 2020, 8, 19665            |
| Ir/VC/C-100                                | 22                  | 45.2                                   | <i>Chem. Commun.</i> , 2021, 57, 10395.              |
| Ir/CNT/rGO                                 | 19                  | 32                                     | <i>Sustain. Energ. Fuels</i> , 2020, 4, 3288.        |
| Ir <sub>16</sub> -PdCu/C                   | 99                  | 90.3                                   | <i>Nano Lett.</i> , 2021, 21, 5774.                  |
| Ni/np-Ir                                   | 20                  | 23                                     | <i>ACS Nano</i> , 2021, 15, 5333.                    |

### Supplementary References

1. A. Singh, K. Teegardin, M. Kelly, K. S. Prasad, S. Krishnan, J. D. Weaver, *J. Organomet. Chem.*, 2015, **776**, 51.
2. L. Zhang, P. Wang, W. Zheng, X. Jiang, *J. Mater. Chem. B.*, 2017, **5**, 6601.
3. Y. Xie, X. Long, X. Li, C. Chang, K. Qu, Z. Yang, *Chem. Commun.*, 2021, **57**, 8620.
